# Supplementary material for: Design and synthesis of VEGFR-2 tyrosine kinase inhibitors as potential anticancer agents by virtual based screening
Source: Royal Society of Chemistry journal article supplement (doi:10.1039/c5ra05277g), 2015-01-01

*Supplementary Information*

# Design and Synthesis of VEGFR-2 Tyrosine Kinase Inhibitors as Potential Anticancer Agents by Virtual Based Screening

Harun M. Patel <sup>†</sup>, Pankaj Bari <sup>‡</sup>, Rajshekhar Karpoormath <sup>†</sup>, Malleshappa Noolvi <sup>§</sup>, Neeta Thapliyal <sup>†</sup>, Sanjay Surana <sup>‡</sup>, Pritam Jain <sup>‡\*</sup>

<sup>†</sup>*Dept. of Pharmaceutical Chemistry, University of KwaZulu-Natal (Westville Campus), Private Bag X54001, Durban- 4000, South Africa.*

<sup>‡</sup>*Department of Pharmaceutical Chemistry, R.C. Patel College of Pharmacy, Shirpur, Dhule 425405, Maharashtra, India*

<sup>§</sup>*Department of Pharmaceutical Chemistry, Shree Dhanvantary Pharmacy College, Kim (Surat)-3941110, Gujrat, India*

**Corresponding Author\***

**Pritam S. Jain**

E-mail: [pritash79@yahoo.com](mailto:pritash79@yahoo.com)

Tel no.: +912563-255189; Fax No.: +912563-251808

---

# Spectral Data

## <sup>1</sup>H NMR Spectral Data of Compound 3

AN 3

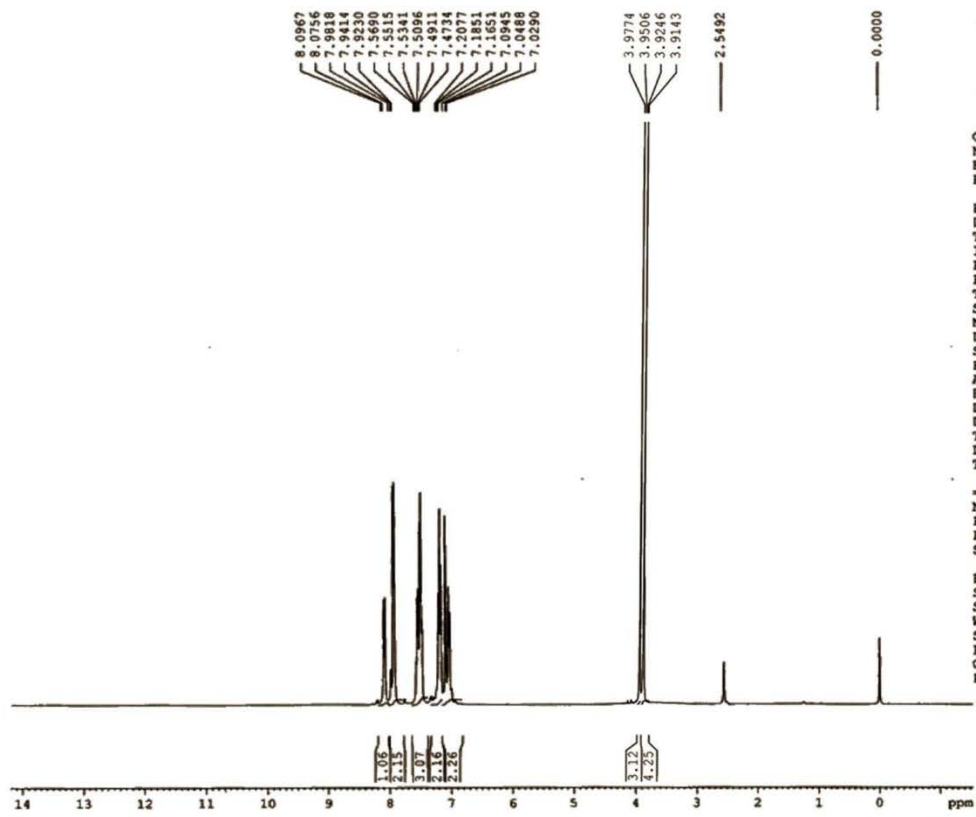

BRUKER  
AVANCE II 400 NMR  
Spectrometer  
SAIF  
Panjab University  
Chandigarh

Current Data Parameters  
NAME Dec27-2012  
EXPNO 110  
PROCNO 1

F2 - Acquisition Parameters  
Date\_ 20110305  
Time 16.36  
INSTRUM spect  
PROBHD 5 mm PABBO BB-  
PULPROG zg30  
TD 65536  
SOLVENT DMSO  
NS 16  
DS 2  
SWH 12019.230 Hz  
FIDRES 0.183399 Hz  
AQ 2.7263477 sec  
RG 362  
DW 41.600 usec  
DE 6.00 usec  
TE 292.8 K  
D1 1.00000000 sec  
TDO 1

----- CHANNEL f1 -----  
NUC1 1H  
P1 10.90 usec  
PL1 -3.00 dB  
SFO1 400.1324008 MHz

F2 - Processing parameters  
SI 32768  
SF 400.1299847 MHz  
WDW EM  
SSB 0  
LB 0.30 Hz  
GB 0  
PC 1.00

avtar\_saifpu@yahoo.co.in

### HRMS Spectral Data of Compound 3

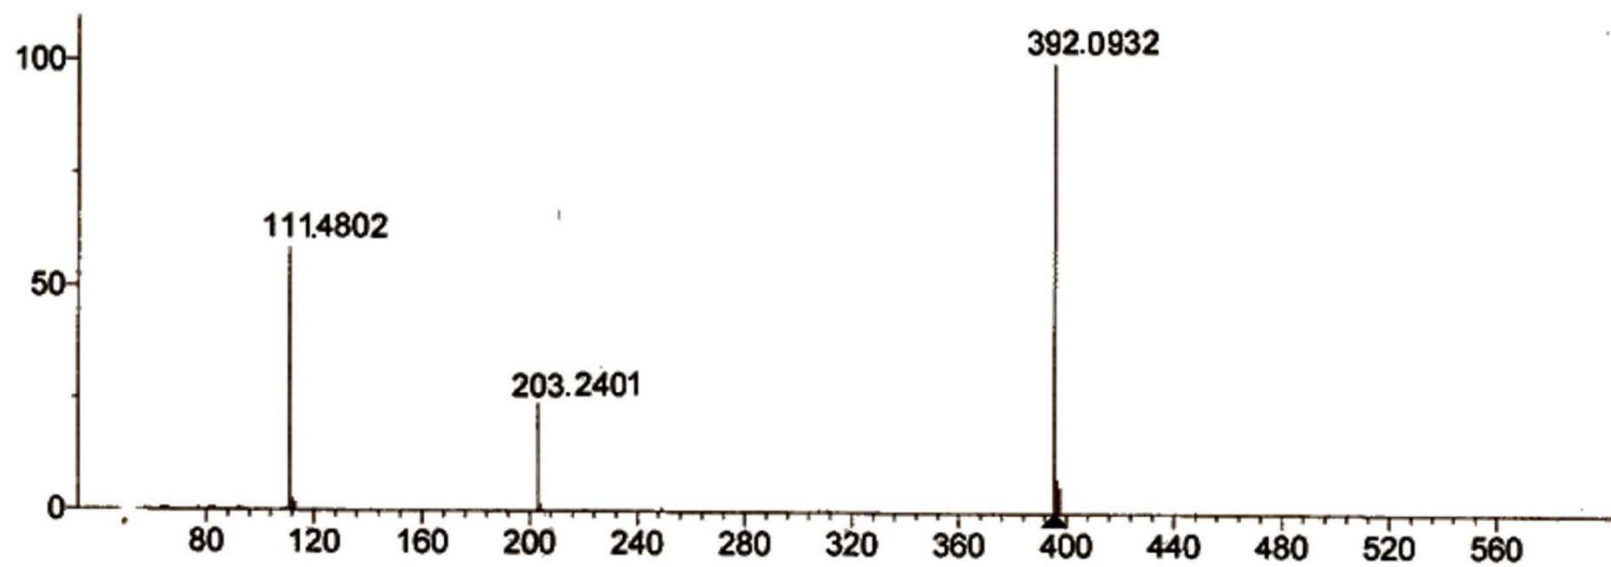

# <sup>1</sup>H NMR Spectral Data of Compound 22

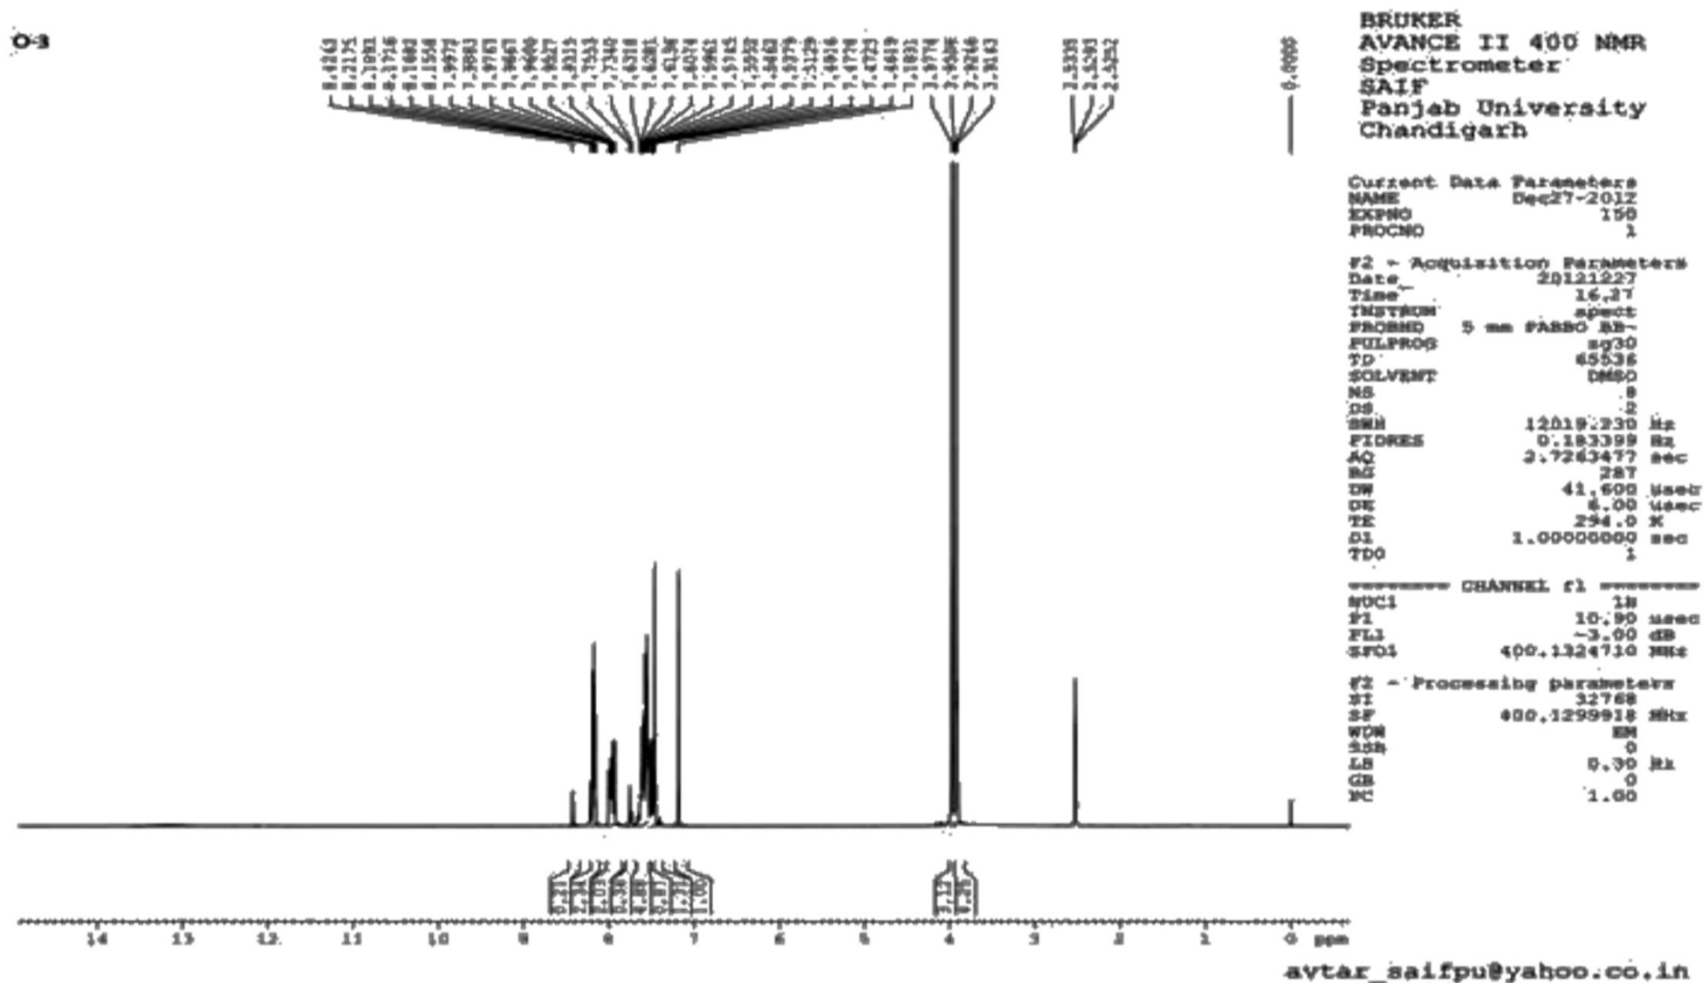

## HRMS Spectral Data of Compound 22

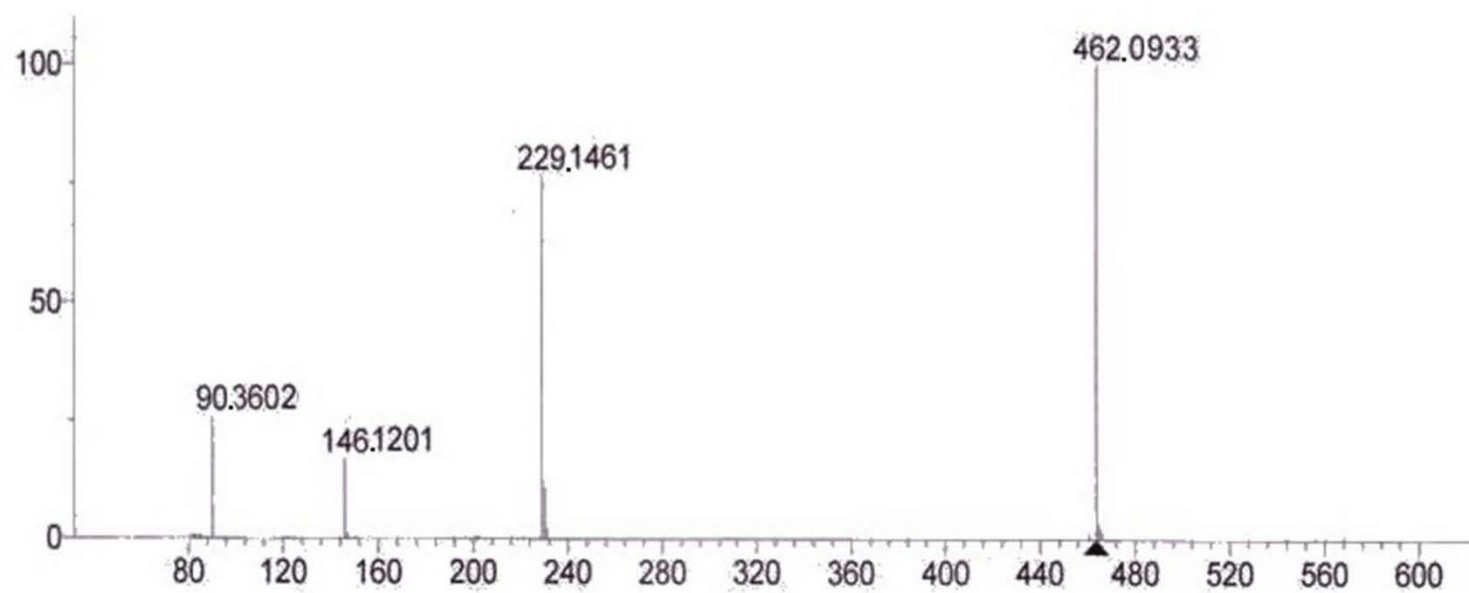

# <sup>1</sup>H NMR Spectral Data of Compound 26

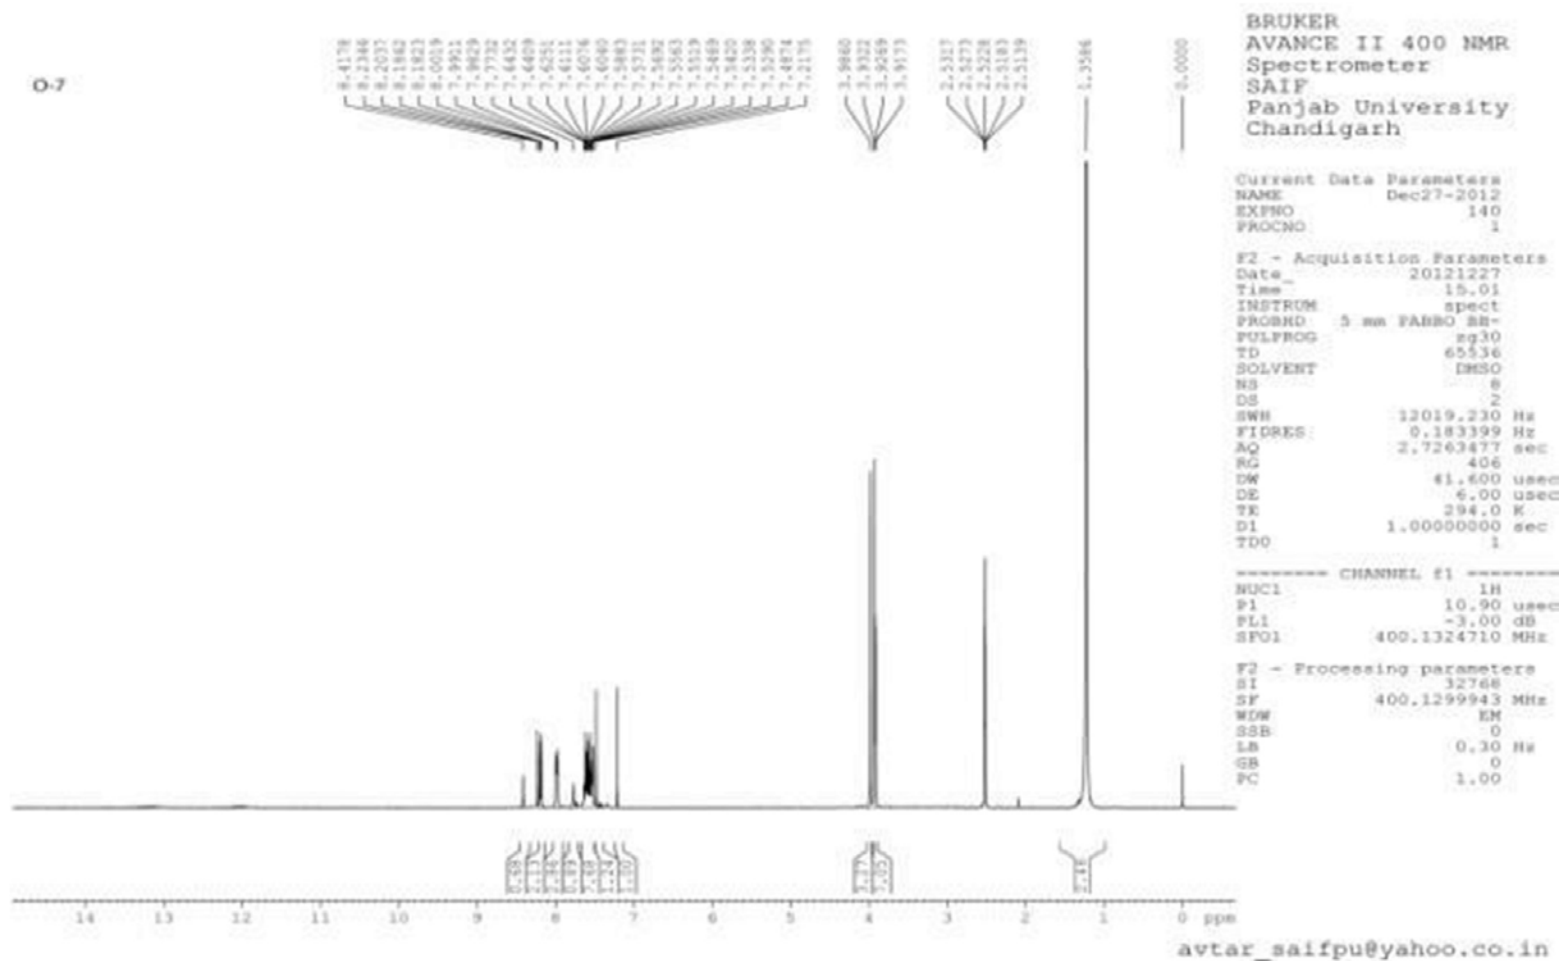

## HRMS Spectral Data of Compound 26

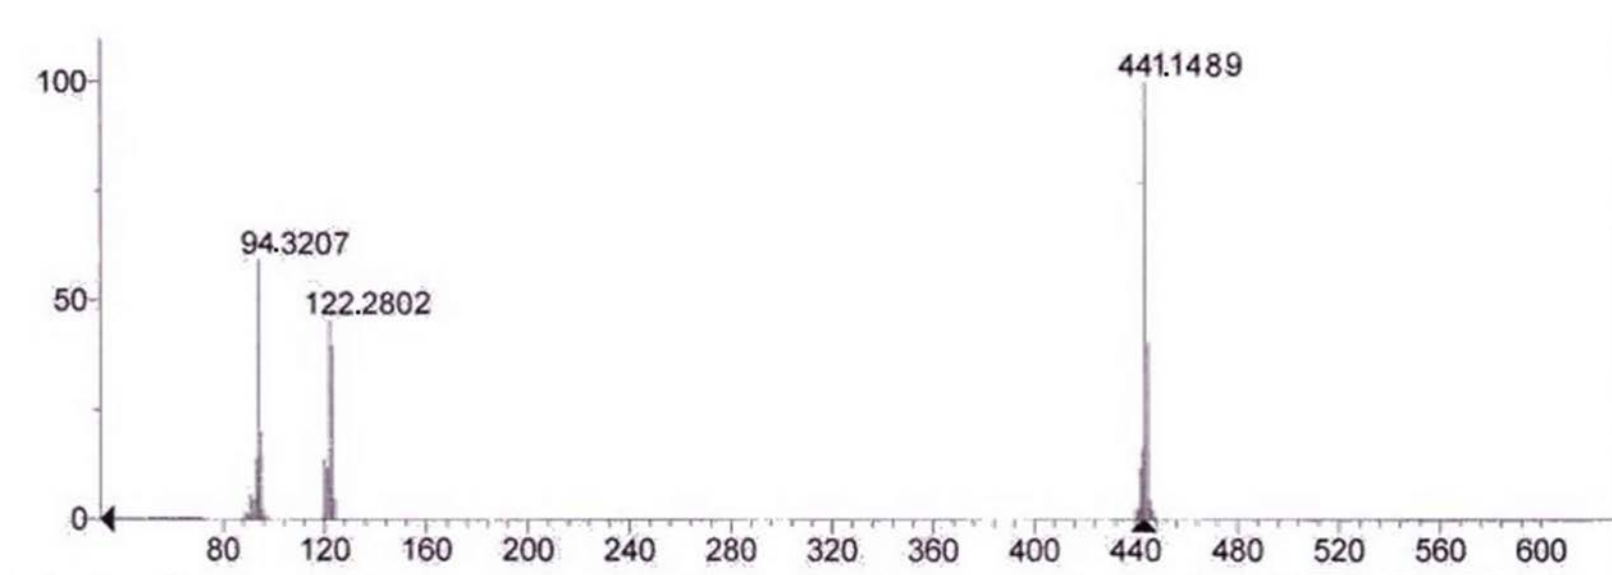

# <sup>1</sup>H NMR Spectral Data of Compound 29

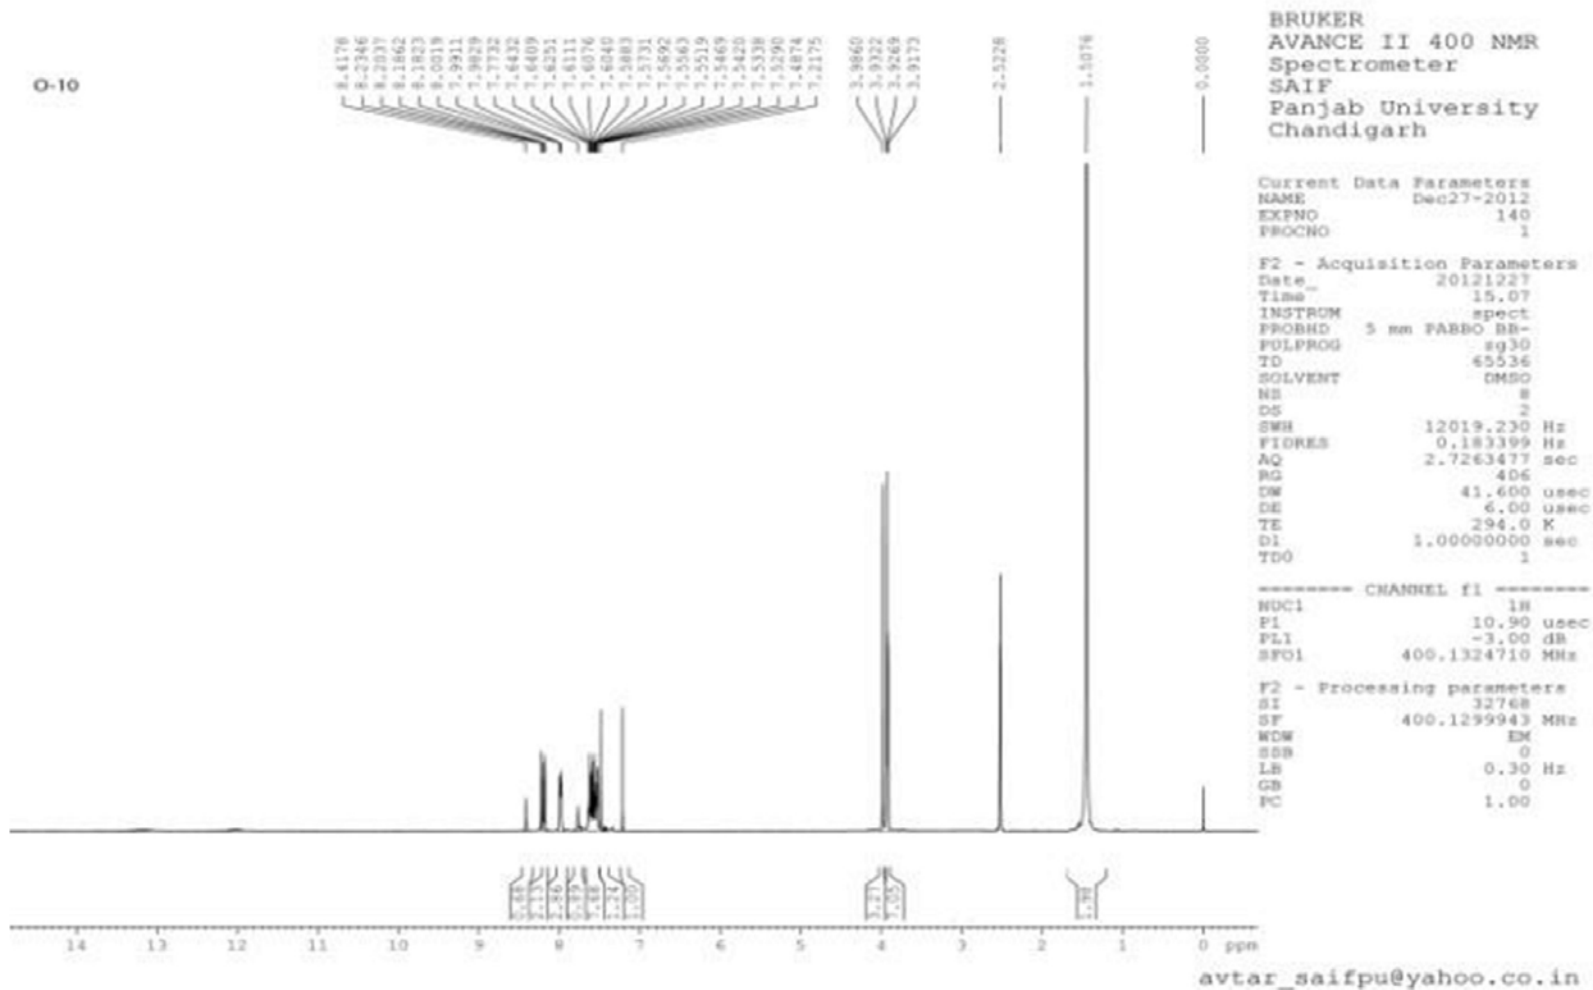



## HRMS Spectral Data of Compound 29

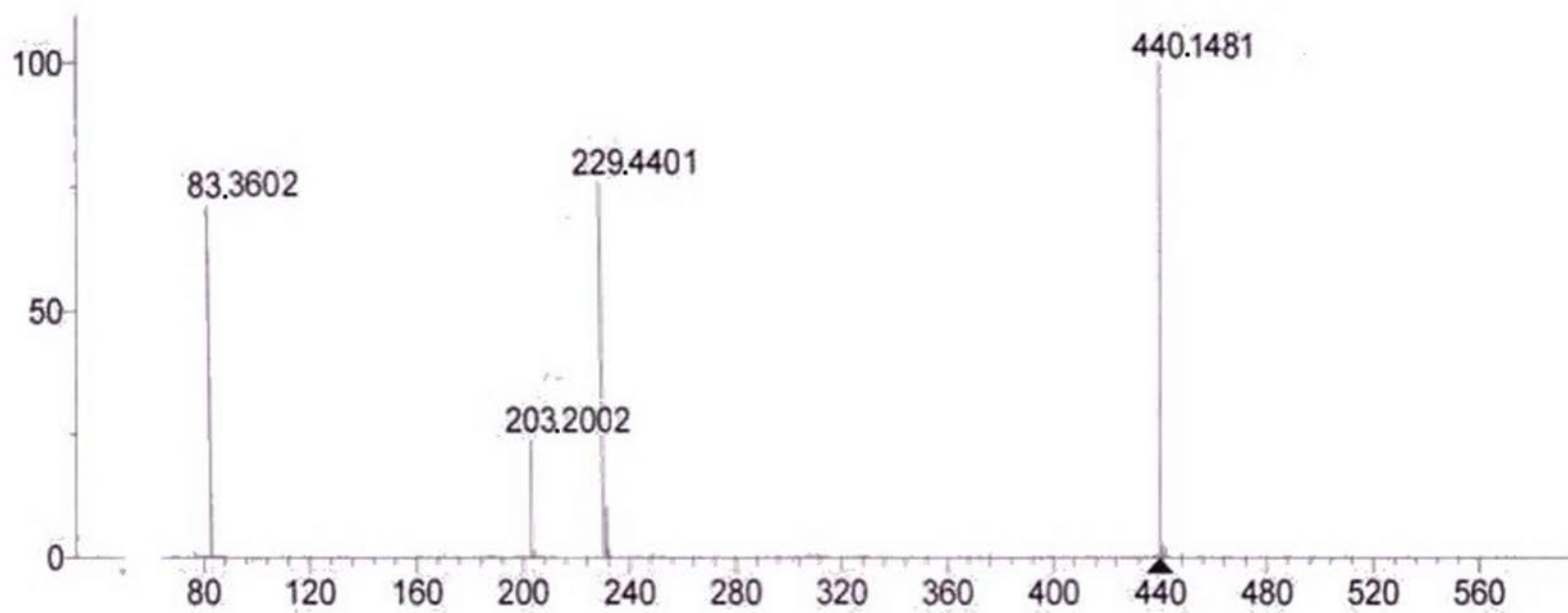

# <sup>1</sup>H NMR Spectral Data of Compound 45

T-1

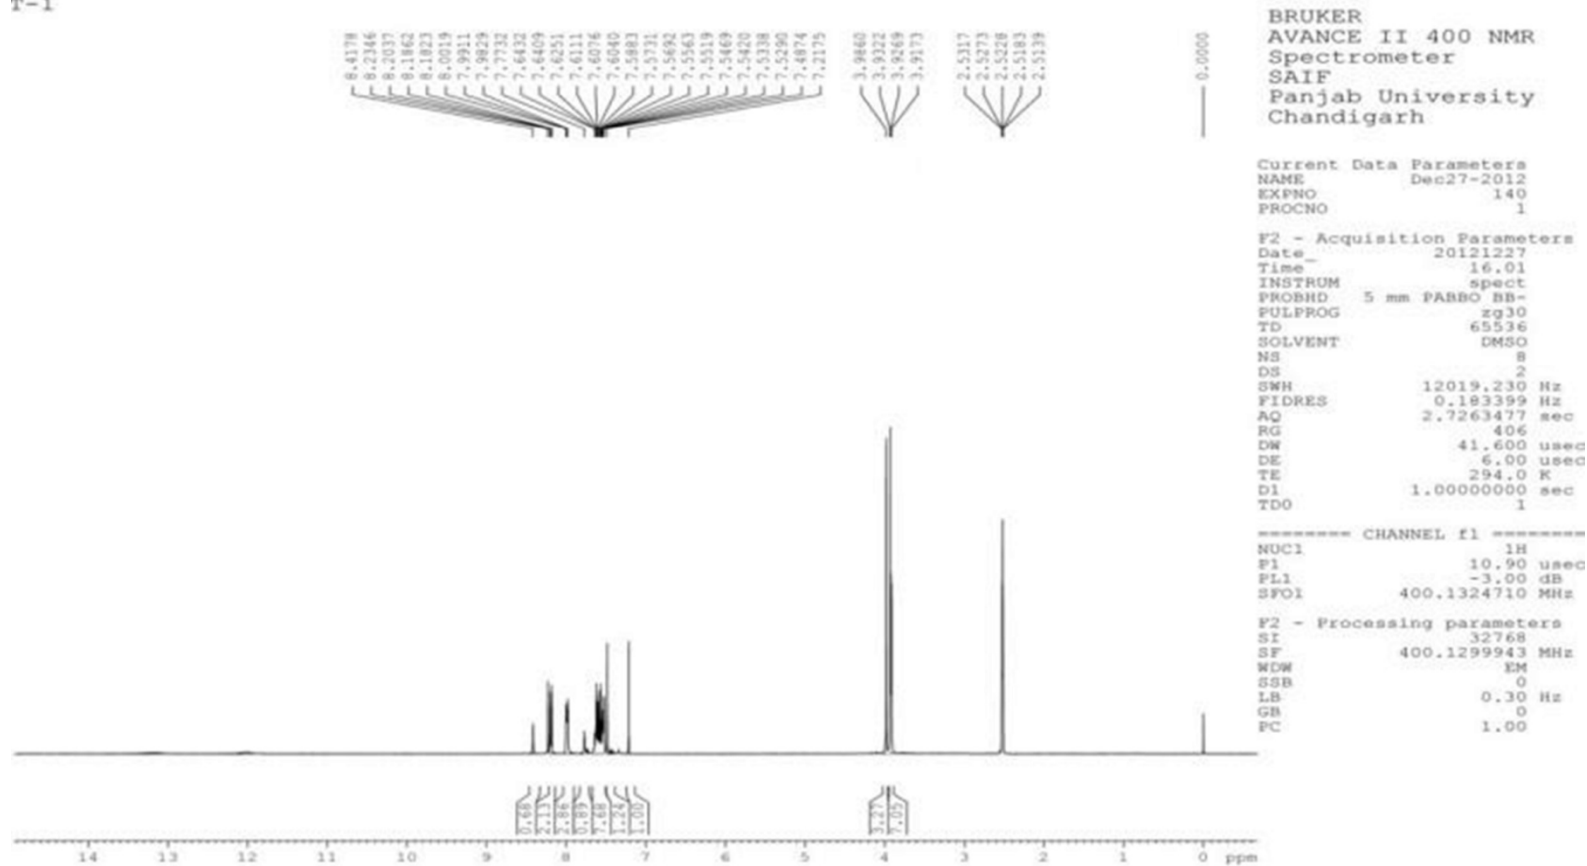

avtar\_saifpu@yahoo.co.in

## HRMS Spectral Data of Compound 45

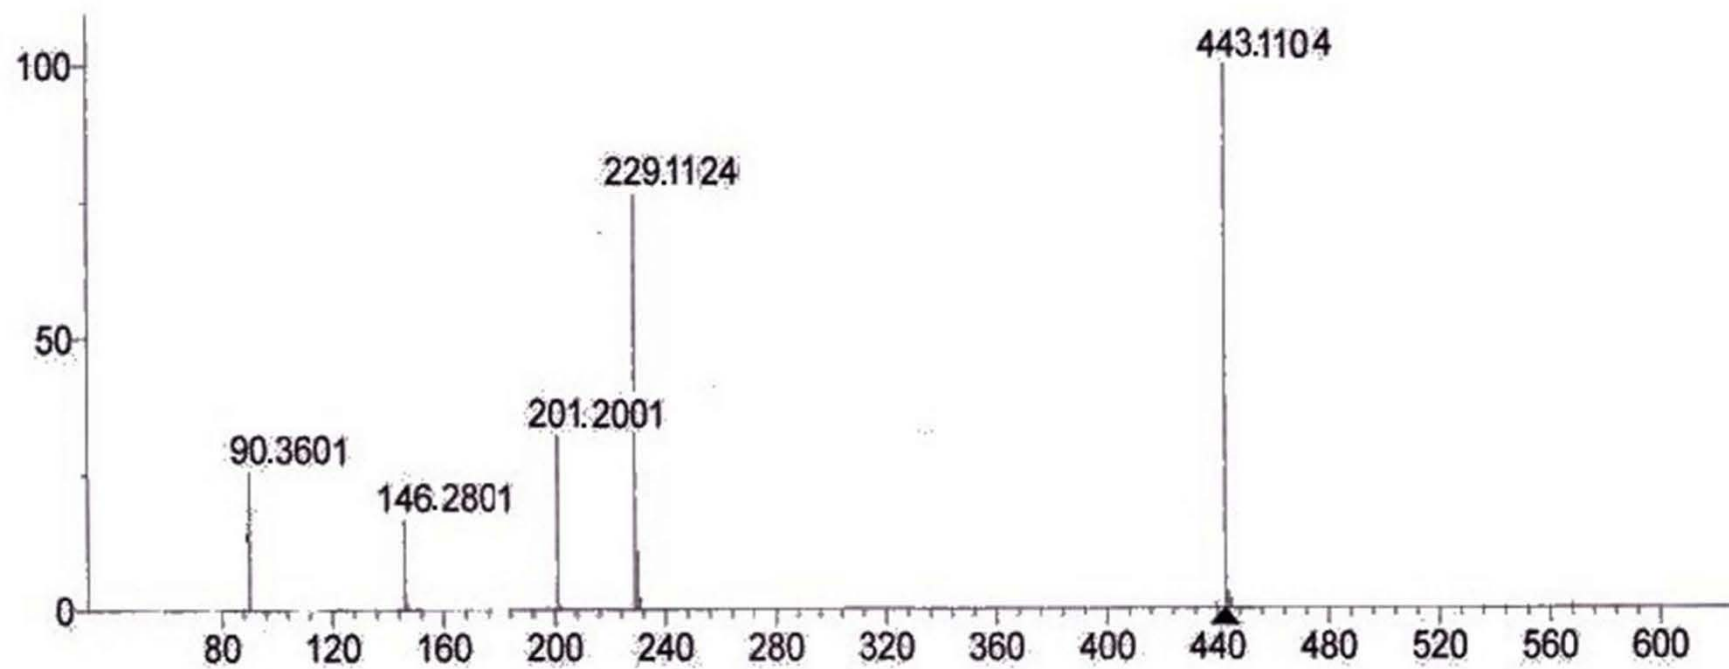



## HRMS Spectral Data of Compound 47

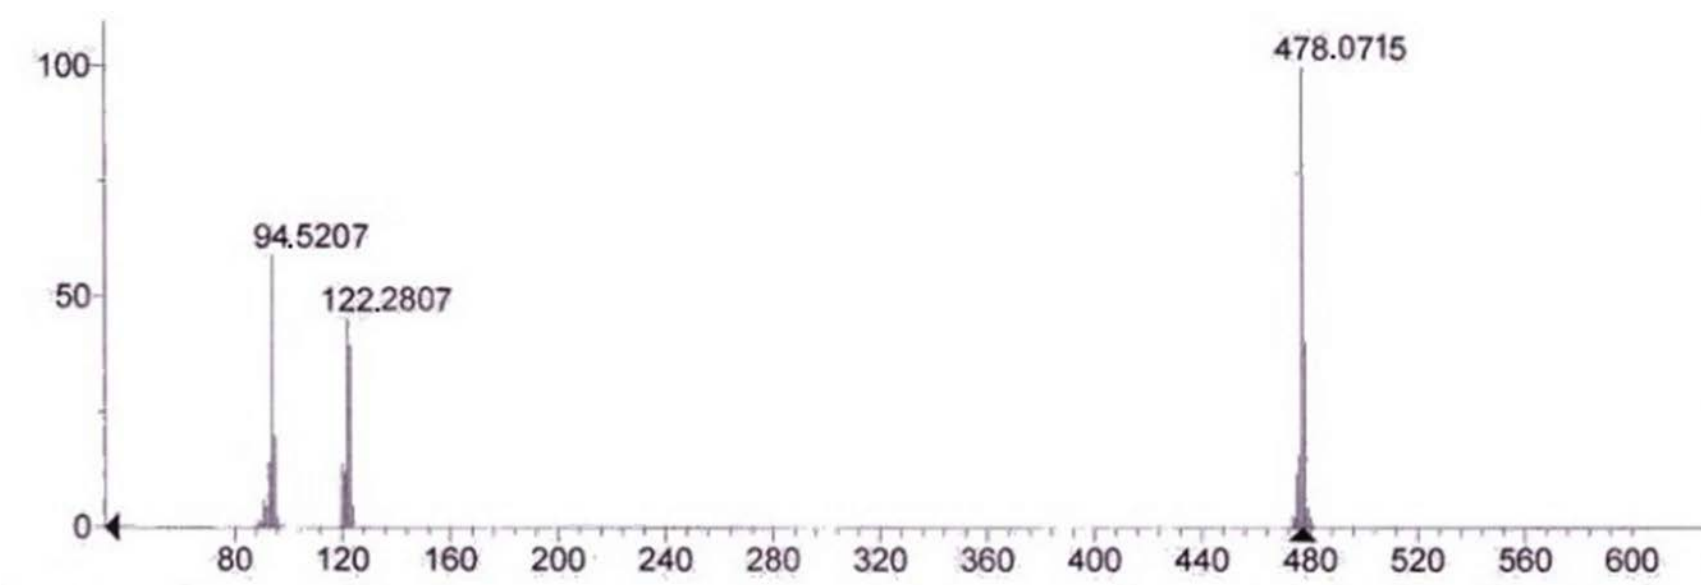

# <sup>1</sup>H NMR Spectral Data of Compound 55

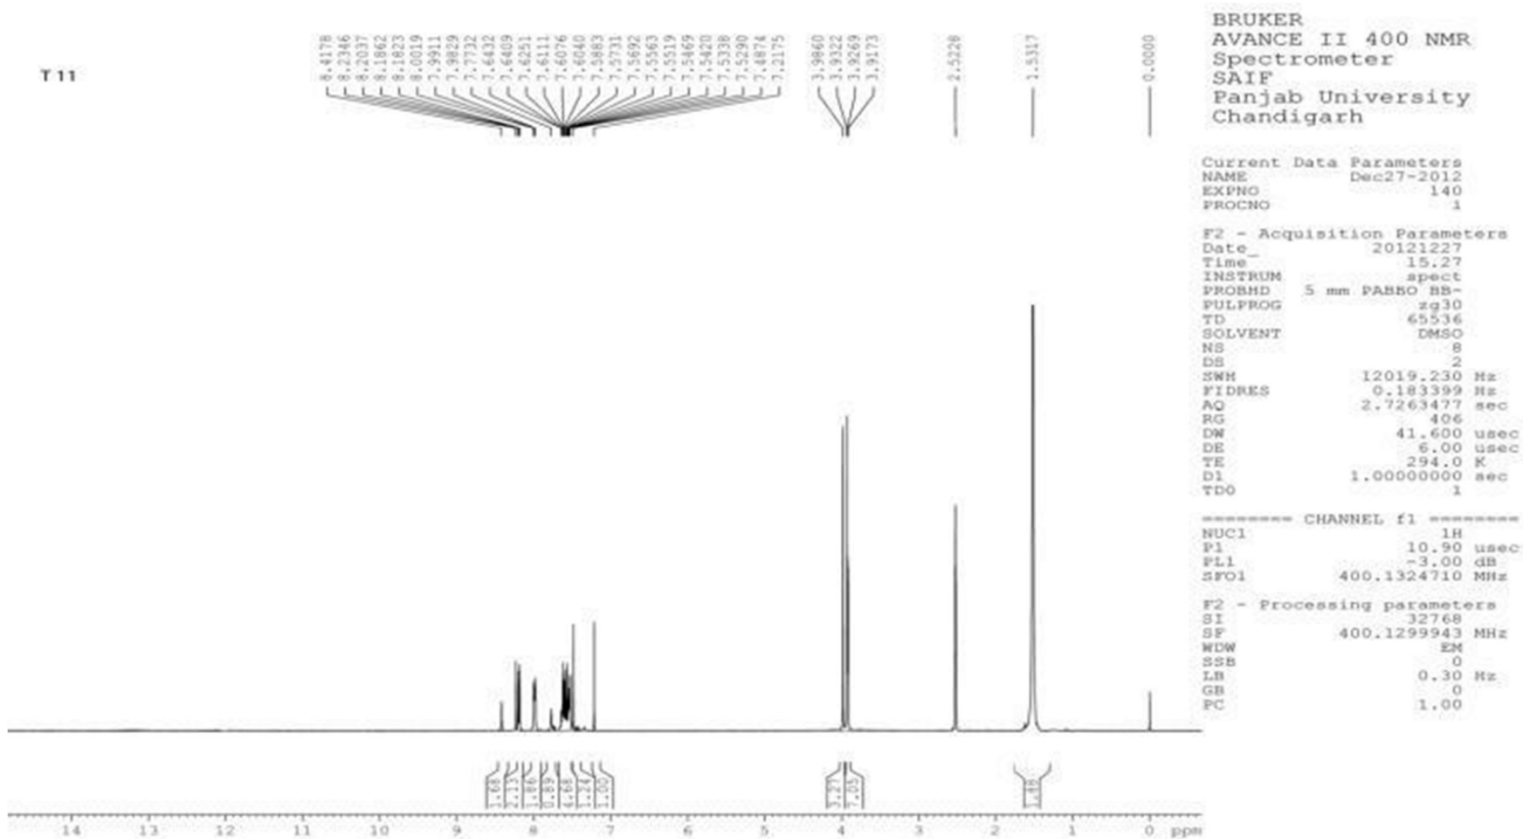

## HRMS Spectral Data of Compound 55

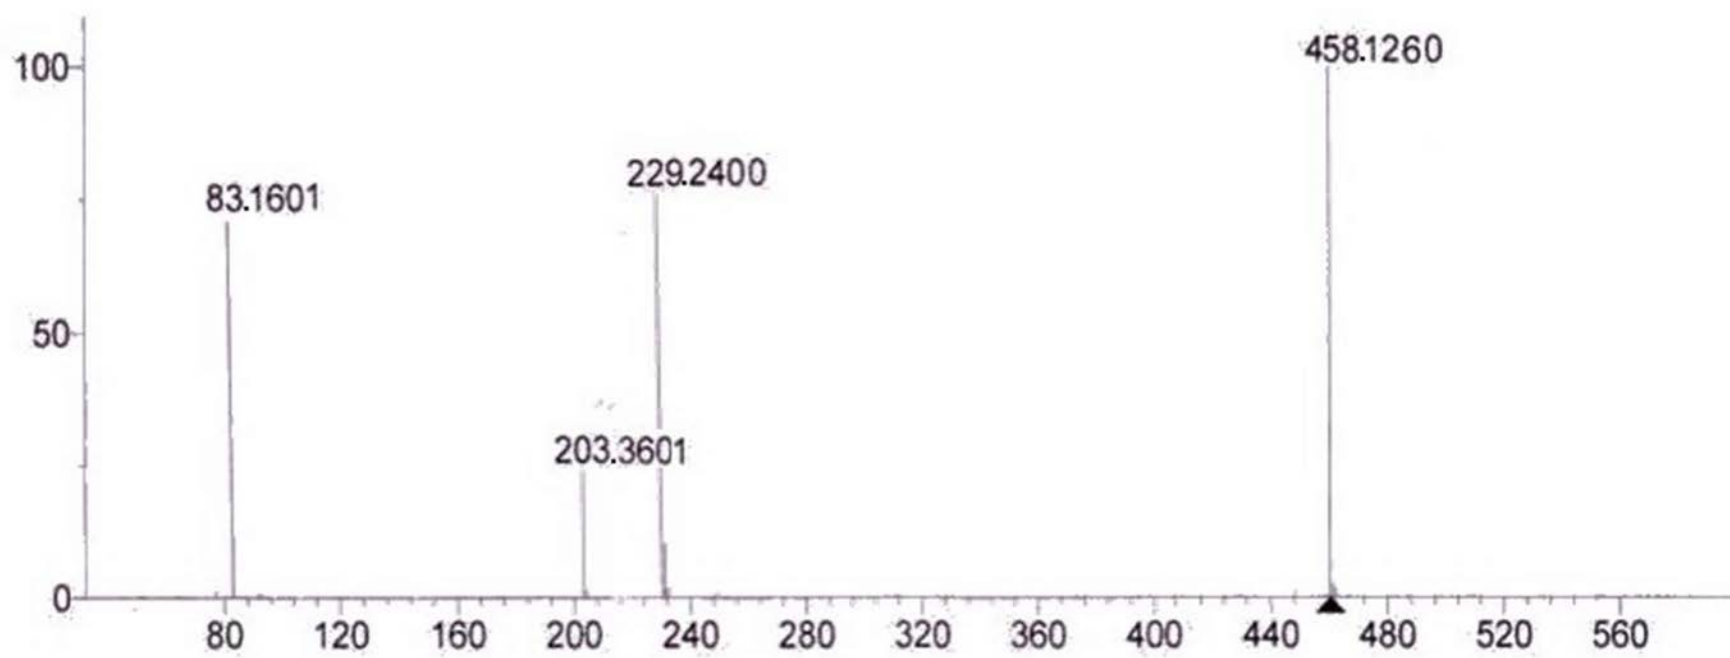

Supplement: c5ra05277g1.pdf [file c5ra05277g1.pdf]
